# Supplementary material
Source: publisher figshare collection journal article supplement (https://diabetesjournals.figshare.com/ndownloader/files/24103469)
Supplement: Supplementary file 1 [file 24103469]

## SUPPLEMENTARY DATA

### **Description of APDQS and its change between Y0 and Y20 in terms of levels and change in food group intake (serving/day).**

The mean total food intake (serving/day) was about 40 at both Y0 and Y20, independently of whether the participant was part of the “high initial and increased” or “low initial and decreased” group (Supplemental Table S1). In general, compared to the “low initial and decreased” group, the “high initial and increased” group reported more servings at Y0 of beneficially-rated plant foods (9.24 vs. 7.37), coffee/tea (2.07 vs. 1.05), and low-fat dairy (1.45 vs. 0.79). They also consumed fewer servings of adversely-rated plant foods (2.73 vs. 3.97), high-fat meats (7.24 vs. 9.95), soft drinks (0.7 vs. 2.24), and whole-fat dairy (5.05 vs. 7.46). After 20 years of follow-up, compared with the “low initial and decreased” group, the “high initial and increased” group showed more desirable change in consumption of beneficially-rated plant foods by 9.23 serving/day, whereas consumption of adversely-rated meat products decreased by 3.3 serving/day. Supplemental Table S2 further elaborates on how the change in APDQS were achieved during a 20-year period and what was the noticeable difference between two groups. Over 20 years, the difference in beneficially-rated (difference: +1.87 serving/day at Y0 and +11.66 serving/day at Y20) and adversely-rated plant foods (difference: -1.25 serving/day at Y0 and -3.03 serving/day at Y20) increased considerably between the two groups, with little change in other foods.

**Supplemental Table S1. Characteristics (Y0) of the participants included and excluded from the analysis**

| <b>Characteristics at Y0</b>            | <b>Excluded<br/>(n=2,580)</b> | <b>Included<br/>(n=2,534)</b> |
|-----------------------------------------|-------------------------------|-------------------------------|
| APDQS*                                  | 61.1±12.6                     | 64.2±13.2                     |
| Age, y                                  | 24.6±3.7                      | 25.1±3.6                      |
| Female, No. (%)                         | 1318 (51.1)                   | 1469 (58)                     |
| white race, No. (%)                     | 1022 (39.6)                   | 1455 (57.4)                   |
| Highest grade of education, y           | 14.6±2.5                      | 16±2.6                        |
| Parental history of diabetes, No. (%)   | 749 (29)                      | 639 (25.2)                    |
| Physical activity, EU†                  | 418.4±307.1                   | 421.9±294.1                   |
| Current smoker, No. (%)                 | 942 (37)                      | 604 (23.8)                    |
| Alcohol intake, drinks/d                | 1.0±2.0                       | 0.8±1.2                       |
| Total energy intake, kcal/d             | 2943.3±1402.2                 | 2698.3±1254                   |
| BMI, kg/m <sup>2</sup>                  | 25.1±5.6                      | 23.9±4.4                      |
| WC, cm                                  | 79.1±12.3                     | 76.3±10.2                     |
| Weight, kg                              | 72.9±17.6                     | 69.3±14.6                     |
| Type 2 diabetes cases (Y0–Y30), No. (%) | 502 (19.5)                    | 206 (8.1)                     |

Abbreviation: APDQS, A Priori Diet Quality Score.

Values are reported as the mean±SD, unless noted as No. (percentage).

\*Total score sums the 46 components (possible scores 0 to 132, with a range of 35–95 in this data), with higher scores representing a healthy, nutritionally rich plant-based diet. A 1-point increment represents a 1-category shift in the presumed favorable direction.

†Exercise units, physical activity score derived from the CARDIA physical activity history.

**Supplemental Table S2. Y0 and Y20 mean intake (serving/day) of 46 individual food groups, sorted by APDQS rating and major food subgroups within each rating group and comparing two extreme groups of participants who represent “low initial and decreased” diet or “high initial and increased” diet**

| Food group (serving/day)         | Y0 mean intake             |                             | Y20 mean intake            |                             |
|----------------------------------|----------------------------|-----------------------------|----------------------------|-----------------------------|
|                                  | Low initial and decreased* | High initial and increased† | Low initial and decreased* | High initial and increased† |
|                                  | n=126                      | n=112                       | n=126                      | n=112                       |
| <b>Beneficially-rated</b>        |                            |                             |                            |                             |
| <b>Plant food</b>                |                            |                             |                            |                             |
| 1. Fruit                         | 1.10                       | 1.60                        | 0.74                       | 2.35                        |
| 2. Avocado                       | 0.01                       | 0.13                        | 0.01                       | 0.36                        |
| 3. Beans/Legumes                 | 0.32                       | 0.16                        | 0.16                       | 0.40                        |
| 4. Green vegetables              | 0.16                       | 0.45                        | 0.24                       | 1.50                        |
| 5. Yellow vegetables             | 0.13                       | 0.40                        | 0.08                       | 0.47                        |
| 6. Tomatoes                      | 0.44                       | 0.58                        | 0.32                       | 0.90                        |
| 7. Other vegetables              | 1.86                       | 2.15                        | 1.37                       | 3.08                        |
| 8. Nuts and seeds                | 0.66                       | 0.63                        | 0.53                       | 2.19                        |
| 9. Soy products                  | 0.19                       | 0.16                        | 0.21                       | 1.05                        |
| 10. Whole grains                 | 1.25                       | 1.52                        | 0.92                       | 2.13                        |
| 11. Vegetable oil                | 1.26                       | 1.47                        | 2.24                       | 4.04                        |
| Subtotal                         | 7.37                       | 9.24                        | 6.81                       | 18.47                       |
| <b>Meat products</b>             |                            |                             |                            |                             |
| 12. Fish                         | 0.06                       | 0.03                        | 0.01                       | 0.06                        |
| 13. Lean fish                    | 0.81                       | 0.77                        | 0.44                       | 1.04                        |
| 14. Poultry                      | 1.36                       | 1.26                        | 1.27                       | 1.57                        |
| Subtotal                         | 2.24                       | 2.06                        | 1.72                       | 2.66                        |
| <b>Alcohol</b>                   |                            |                             |                            |                             |
| 15. Moderate amounts of beer     | 0.73                       | 0.55                        | 0.25                       | 0.28                        |
| 16. Moderate amounts of wine     | 0.08                       | 0.27                        | 0.05                       | 0.73                        |
| 17. Moderate amounts of liquor   | 0.27                       | 0.22                        | 0.10                       | 0.26                        |
| Subtotal                         | 1.08                       | 1.04                        | 0.41                       | 1.27                        |
| <b>Other non-dairy beverages</b> |                            |                             |                            |                             |
| 18. Coffee                       | 0.54                       | 1.43                        | 0.68                       | 1.98                        |
| 19. Tea                          | 0.50                       | 0.64                        | 0.61                       | 1.08                        |
| Subtotal                         | 1.05                       | 2.07                        | 1.29                       | 3.07                        |
| <b>Dairy</b>                     |                            |                             |                            |                             |
| 20. Low-fat milk/Cheese/Yogurt   | 0.79                       | 1.45                        | 0.87                       | 1.76                        |
| Subtotal                         | 0.79                       | 1.45                        | 0.87                       | 1.76                        |
| <b>Beneficially-rated total</b>  | <b>12.52</b>               | <b>15.85</b>                | <b>11.10</b>               | <b>27.23</b>                |
| <b>Neutrally-rated</b>           |                            |                             |                            |                             |
| <b>Plant food</b>                |                            |                             |                            |                             |
| 1. Potatoes                      | 0.62                       | 0.37                        | 0.32                       | 0.22                        |
| 2. Refined grains                | 5.48                       | 3.62                        | 4.75                       | 2.32                        |
| 3. Margarine                     | 1.70                       | 1.47                        | 1.01                       | 0.83                        |
| 4. Chocolate                     | 0.25                       | 0.19                        | 0.26                       | 0.17                        |
| 5. Meal replacements             | 0.03                       | 0.01                        | 0.11                       | 0.05                        |
| 6. Pickled foods                 | 0.37                       | 0.46                        | 0.33                       | 0.63                        |
| 7. Sugar substitutes             | 0.01                       | 0.09                        | 0.11                       | 0.83                        |

|                                  |       |       |       |       |
|----------------------------------|-------|-------|-------|-------|
| Subtotal                         | 8.45  | 6.21  | 6.88  | 5.06  |
| <b>Meat Products</b>             |       |       |       |       |
| 8. Lean meats                    | 0.91  | 0.72  | 0.30  | 0.48  |
| 9. Shellfish                     | 0.16  | 0.25  | 0.15  | 0.38  |
| 10. Eggs                         | 0.80  | 0.44  | 0.64  | 0.52  |
| 11. Soups                        | 0.04  | 0.05  | 0.03  | 0.08  |
| Subtotal                         | 1.91  | 1.46  | 1.12  | 1.46  |
| <b>Other non-dairy beverages</b> |       |       |       |       |
| 12. Diet drinks                  | 0.30  | 0.65  | 0.38  | 0.63  |
| 13. Fruit juices                 | 1.65  | 1.75  | 1.01  | 0.72  |
| Subtotal                         | 1.95  | 2.40  | 1.39  | 1.35  |
| <b>Neutrally-rated total</b>     | 12.31 | 10.07 | 9.39  | 7.87  |
| <b>Adversely-rated</b>           |       |       |       |       |
| <b>Plant food</b>                |       |       |       |       |
| 1. Fried potatoes                | 0.35  | 0.24  | 0.36  | 0.08  |
| 2. Grain dessert                 | 0.79  | 0.54  | 1.25  | 0.29  |
| 3. Salty snacks                  | 0.02  | 0.03  | 0.24  | 0.17  |
| 4. Pastries                      | 0.97  | 0.73  | 1.10  | 0.39  |
| 5. Sweets                        | 1.84  | 1.19  | 2.23  | 1.22  |
| Subtotal                         | 3.97  | 2.73  | 5.18  | 2.15  |
| <b>Meat Products</b>             |       |       |       |       |
| 6. High-fat meats                | 3.11  | 1.98  | 2.32  | 0.90  |
| 7. Processed meats               | 1.13  | 0.54  | 1.37  | 0.50  |
| 8. Organ meats                   | 0.04  | 0.04  | 0.06  | 0.01  |
| 9. Fried fish/Poultry            | 0.07  | 0.12  | 0.42  | 0.04  |
| 10. Sauces                       | 5.59  | 4.56  | 2.56  | 2.50  |
| Subtotal                         | 9.95  | 7.24  | 6.73  | 3.94  |
| <b>Other non-dairy beverages</b> |       |       |       |       |
| 11. Soft drink                   | 2.24  | 0.70  | 2.47  | 0.18  |
| Subtotal                         | 2.24  | 0.70  | 2.47  | 0.18  |
| <b>Dairy</b>                     |       |       |       |       |
| 12. Whole-fat milk/Cheese/Yogurt | 1.96  | 1.70  | 1.55  | 0.83  |
| 13. Butter                       | 5.51  | 3.34  | 2.88  | 1.31  |
| Subtotal                         | 7.46  | 5.05  | 4.44  | 2.14  |
| <b>Adversely-rated total</b>     | 23.63 | 15.71 | 18.82 | 8.41  |
| <b>Grand total</b>               | 48.46 | 41.63 | 39.32 | 43.52 |

\*“Low initial and decreasing” was defined as below the median Y0 APDQS and quintile 1 of 20-year change.

†“High initial and increased” was defined as at or above the median Y0 APDQS and quintile 5 of 20-year change.

**Supplemental Table S3. Characterization of foods eaten in high vs low APDQS: Mean difference in food intake (serving/day), comparing “high initial and increased” group vs. “low initial and decreased”<sup>\*</sup> summarized into five general food groups within APDQS rating categories<sup>†</sup>**

|                           | Plant food |            |                | Meat products |            |                | Alcohol   |            |                | Other non-dairy beverages |            |                | Dairy     |            |                |
|---------------------------|------------|------------|----------------|---------------|------------|----------------|-----------|------------|----------------|---------------------------|------------|----------------|-----------|------------|----------------|
|                           | LD<br>(I)  | HI<br>(II) | diff<br>(II–I) | LD<br>(I)     | HI<br>(II) | diff<br>(II–I) | LD<br>(I) | HI<br>(II) | diff<br>(II–I) | LD<br>(I)                 | HI<br>(II) | diff<br>(II–I) | LD<br>(I) | HI<br>(II) | diff<br>(II–I) |
| <b>Beneficially-rated</b> |            |            |                |               |            |                |           |            |                |                           |            |                |           |            |                |
| Y0                        | 7.37       | 9.24       | 1.87           | 2.24          | 2.06       | -0.18          | 1.08      | 1.04       | -0.04          | 1.05                      | 2.07       | 1.02           | 0.79      | 1.45       | 0.66           |
| Y20                       | 6.81       | 18.47      | 11.66          | 1.72          | 2.66       | 0.94           | 0.41      | 1.27       | 0.87           | 1.29                      | 3.07       | 1.78           | 0.87      | 1.76       | 0.89           |
| <b>Neutrally-rated</b>    |            |            |                |               |            |                |           |            |                |                           |            |                |           |            |                |
| Y0                        | 8.45       | 6.21       | -2.24          | 1.91          | 1.46       | -0.45          | NA        | NA         | NA             | 1.95                      | 2.40       | 0.46           | NA        | NA         | NA             |
| Y20                       | 6.88       | 5.06       | -1.82          | 1.12          | 1.46       | 0.34           | NA        | NA         | NA             | 1.39                      | 1.35       | -0.04          | NA        | NA         | NA             |
| <b>Adversely-rated</b>    |            |            |                |               |            |                |           |            |                |                           |            |                |           |            |                |
| Y0                        | 3.97       | 2.73       | -1.25          | 9.95          | 7.24       | -2.71          | NA        | NA         | NA             | 2.24                      | 0.70       | -1.55          | 7.46      | 5.05       | -2.42          |
| Y20                       | 5.18       | 2.15       | -3.03          | 6.73          | 3.94       | -2.79          | NA        | NA         | NA             | 2.47                      | 0.18       | -2.29          | 4.44      | 2.14       | -2.30          |

Abbreviation: LD, low initial and decreased; HI, high initial and increased; NA, not applicable.

<sup>\*</sup>“Low initial and decreasing” was defined as below the median Y0 APDQS and quintile 1 of 20–year change; “high initial and increased” was defined as at or above the median Y0 APDQS and quintile 5 of 20–year change.

<sup>†</sup>Using the subtotal statistics presented in Supplemental Table S2 for each exam (column I for LD and column II for HI), the mean difference between the extreme APDQS food score categories is serving/day in column II – serving/day in column I for five general food categories.

**Supplemental Table S4. APDQS food groups and its constituent subgroups**

|                                     |                                                           |                                                      |
|-------------------------------------|-----------------------------------------------------------|------------------------------------------------------|
| <b>1. Fruit</b>                     | Vegetable-based savory snack                              | Loaf-type bread and plain rolls - whole grain        |
| Citrus fruit                        | <b>8. Nuts and seeds</b>                                  | Crackers - whole grain                               |
| Fruit excluding citrus fruit        | Nuts and seeds                                            | Pasta - whole grain                                  |
| Fried fruits                        | Nut and seed butters                                      | Ready-to-eat cereal (not presweetened) - whole grain |
| Fruit-based savory snack            | <b>9. Soy products</b>                                    | Ready-to-eat cereal (presweetened) - whole grain     |
| <b>2. Avocado</b>                   | Meat alternatives                                         | Popcorn                                              |
| Avocado/guacamole and similar       | Milk – nondairy                                           | Flavored popcorn                                     |
| <b>3. Beans/Legumes</b>             | Cheese – nondairy                                         | Snack bars - some whole grain                        |
| Legumes (cooked dried beans)        | Yogurt – nondairy                                         | Snack bars - whole grain                             |
| <b>4. Green vegetables</b>          | Frozen nondairy dessert                                   | <b>11. Vegetable oil</b>                             |
| Dark-green vegetables               | Cream – nondairy                                          | Oil                                                  |
| <b>5. Yellow vegetables</b>         | <b>10. Whole grains</b>                                   | Fried vegetables                                     |
| Deep-yellow vegetables              | Grains, flour and dry mixes - some whole grain            | <b>12. Fish</b>                                      |
| <b>6. Tomatoes</b>                  | Loaf-type bread and plain rolls - some whole grain        | Fish - fresh and smoked                              |
| Tomato                              | Crackers - some whole grain                               | <b>13. Lean fish</b>                                 |
| <b>7. Other vegetables</b>          | Pasta - some whole grain                                  | Lean fish - fresh and smoked                         |
| Other starchy vegetables            | Ready-to-eat cereal (not presweetened) - some whole grain | <b>14. Poultry</b>                                   |
| Other vegetables                    | Ready-to-eat cereal (presweetened) - whole grain          | Poultry                                              |
| Fried vegetables                    | Grains, flour and dry mixes - whole grain                 | Lean poultry                                         |
| <b>15. Moderate amounts of beer</b> | Artificially sweetened tea                                | Cheese - reduced fat                                 |

|                                           |                                                                            |                                                        |
|-------------------------------------------|----------------------------------------------------------------------------|--------------------------------------------------------|
| Beer and ales                             | Unsweetened tea                                                            | Cheese - low fat and fat free                          |
| <b>16. Moderate amounts of wine</b>       | Nondairy-based artificially sweetened meal replacement/supplement          | <b>21. Potatoes</b>                                    |
| Wine                                      | <b>20. Low-fat milk/Cheese/Yogurt</b>                                      | White potatoes                                         |
| <b>17. Moderate amounts of liquor</b>     | Yogurt - sweetened low fat                                                 | <b>22. Refined grains</b>                              |
| Cordial and liqueur                       | Yogurt - sweetened fat free                                                | Ready-to-eat cereal (not presweetened) - refined grain |
| Distilled liquor                          | Yogurt - artificially sweetened low fat                                    | Ready-to-eat cereal (presweetened) - refined grain     |
| <b>18. Coffee</b>                         | Yogurt - artificially sweetened fat free                                   | Crackers - refined grain                               |
| Sweetened coffee                          | Milk - reduced fat                                                         | Pasta - refined grain                                  |
| Artificially sweetened coffee             | Milk - low fat and fat free                                                | Grains, flour and dry mixes - refined grain            |
| Unsweetened coffee                        | Ready-to-drink flavored milk - reduced fat                                 | Loaf-type bread and plain rolls - refined grain        |
| Sweetened coffee substitutes              | Ready-to-drink flavored milk - low fat and fat free                        | Snack bars - refined grain                             |
| Artificially sweetened coffee substitutes | Sweetened flavored milk beverage powder with non-fat dry milk              | <b>23. Margarine</b>                                   |
| Unsweetened coffee substitutes            | Artificially sweetened flavored milk beverage powder with non-fat dry milk | Margarine - regular                                    |
| <b>19. Tea</b>                            | Cream - reduced fat                                                        | Margarine - reduced fat                                |
| Sweetened tea                             | Cream - low fat and fat free                                               | <b>24. Chocolate</b>                                   |

|                                                                   |                                                                              |                                                                                   |
|-------------------------------------------------------------------|------------------------------------------------------------------------------|-----------------------------------------------------------------------------------|
| Chocolate candy                                                   | Shellfish                                                                    | Cakes, cookies, pies, pastries, danish, doughnuts and cobblers - some whole grain |
| <b>25. Meal replacements</b>                                      | <b>30. Eggs</b>                                                              | Cakes, cookies, pies, pastries, danish, doughnuts and cobblers - refined grain    |
| Dairy-based sweetened meal replacement/supplement                 | Eggs                                                                         | Miscellaneous dessert                                                             |
| Dairy-based artificially sweetened meal replacement/supplement    | Egg substitute                                                               | <b>36. Salty snacks</b>                                                           |
| Nondairy-based sweetened meal replacement/supplement              | <b>31. Soups</b>                                                             | Snack chips - whole grain                                                         |
| Nondairy-based artificially sweetened meal replacement/supplement | Soup broth                                                                   | Snack chips - some whole grain                                                    |
| Nondairy-based unsweetened meal replacement/supplement            | <b>32. Diet drinks</b>                                                       | Snack chips - refined grain                                                       |
| <b>26. Pickled foods</b>                                          | Artificially sweetened soft drinks                                           | <b>37. Pastries</b>                                                               |
| Pickled foods                                                     | Unsweetened soft drinks                                                      | Other breads (quick breads, corn muffins, tortillas) - whole grain                |
| <b>27. Sugar substitutes</b>                                      | Artificially sweetened water                                                 | Other breads (quick breads, corn muffins, tortillas) - some whole grain           |
| Sugar substitute                                                  | Artificially sweetened fruit drinks                                          | Other breads (quick breads, corn muffins, tortillas) - refined grain              |
| <b>28. Lean meats</b>                                             | <b>33. Fruit juices</b>                                                      | <b>38. Sweets</b>                                                                 |
| Beef                                                              | Citrus juice                                                                 | Sugar                                                                             |
| Veal                                                              | Fruit juice excluding citrus juice                                           | Syrup, honey, jam, jelly, preserves                                               |
| Lamb                                                              | <b>34. Fried potatoes</b>                                                    | Non-chocolate candy                                                               |
| Cured pork                                                        | Fried potatoes                                                               | Frosting or glaze                                                                 |
| Fresh pork                                                        | <b>35. Grain dessert</b>                                                     | <b>39. High-fat meats</b>                                                         |
| <b>29. Shellfish</b>                                              | Cakes, cookies, pies, pastries, danish, doughnuts and cobblers - whole grain | Lean fresh pork                                                                   |

|                                                       |                                                        |                                                                               |
|-------------------------------------------------------|--------------------------------------------------------|-------------------------------------------------------------------------------|
| Lean lamb                                             | Sauces, sweet – regular                                | Ready-to-drink flavored milk – whole                                          |
| Lean cured pork                                       | Sauces, sweet - reduced fat/reduced calorie/fat free   | Sweetened flavored milk beverage powder without non-fat dry milk              |
| Game                                                  | Sauces and condiments - regular                        | Artificially sweetened flavored milk beverage powder without non-fat dry milk |
| Lean veal                                             | Sauces and condiments - reduced fat                    | Cheese - full fat                                                             |
| Lean beef                                             | <b>44. Soft drink</b>                                  | <b>46. Butter</b>                                                             |
| <b>40. Processed meats</b>                            | Sweetened soft drinks                                  | Butter and other animal fats – regular                                        |
| Cold cuts and sausage                                 | Sweetened water                                        | Butter and other animal fats - reduced fat                                    |
| Lean cold cuts and sausage                            | Sweetened fruit drinks                                 | Shortening                                                                    |
| Meat-based savory snack                               | Non-alcoholic beer                                     |                                                                               |
| <b>41. Organ meats</b>                                | Non-alcoholic light beer                               |                                                                               |
| Organ meats                                           | <b>45. Whole-fat milk/Cheese/Yogurt</b>                |                                                                               |
| <b>42. Fried fish/Poultry</b>                         | Yogurt - sweetened whole milk                          |                                                                               |
| Fried chicken - commercial entrée and fast food       | Yogurt - artificially sweetened whole milk             |                                                                               |
| Fried fish - commercial entrée and fast food          | Frozen dairy dessert                                   |                                                                               |
| Fried shellfish - commercial entrée and fast food     | Pudding and other dairy dessert                        |                                                                               |
| <b>43. Sauces</b>                                     | Artificially sweetened pudding and other dairy dessert |                                                                               |
| Salad dressing – regular                              | Cream                                                  |                                                                               |
| Salad dressing - reduced fat/reduced calorie/fat free | Milk – whole                                           |                                                                               |

**Supplemental Table S5. HR (95% CI) of incident type 2 diabetes quintile of 7-year change, Y0, or Y20 APDQS (n=3,541)**

|                                                                                                       | Quintile 1       | Quintile 2       | Quintile 3       | Quintile 4       | Quintile 5       | Each 1-SD<br>(13-point)<br>increment* | P for<br>Trend |
|-------------------------------------------------------------------------------------------------------|------------------|------------------|------------------|------------------|------------------|---------------------------------------|----------------|
| <b>Joint predictor model (both APDQS variables in one model)<sup>¶</sup></b>                          |                  |                  |                  |                  |                  |                                       |                |
| <b>7-year change in APDQS<br/>predicting type 2 diabetes<br/>in the subsequent 23 years</b>           |                  |                  |                  |                  |                  |                                       |                |
| Range                                                                                                 | < -5             | -5 to 0          | 1 to 5           | 6 to 12          | ≥ 13             |                                       |                |
| no. of cases/ N at risk<br>(unadjusted cumulative<br>incidence rate)                                  | 114/695 (16.4)   | 88/683 (12.9)    | 86/708 (12.2)    | 112/783 (14.3)   | 92/672 (13.7)    |                                       |                |
| Model 1: Basic model <sup>†</sup>                                                                     | 1.50 (1.13–1.99) | 1 (ref)          | 0.88 (0.65–1.18) | 1.02 (0.77–1.35) | 0.89 (0.66–1.21) | 0.81 (0.72–0.92)                      | 0.001          |
| Model 2: Full-adjusted<br>model <sup>‡</sup>                                                          | 1.39 (1.04–1.84) | 1 (ref)          | 0.89 (0.66–1.20) | 1.01 (0.76–1.35) | 0.98 (0.72–1.33) | 0.87 (0.76–0.99)                      | 0.035          |
| <b>Y0 APDQS predicting<br/>type 2 diabetes in the<br/>subsequent 23 years, after<br/>a 7-year lag</b> |                  |                  |                  |                  |                  |                                       |                |
| Range                                                                                                 | < 53             | 53 to 59         | 60 to 66         | 67 to 75         | ≥ 76             |                                       |                |
| no. of cases/ N at risk<br>(unadjusted cumulative<br>incidence rate)                                  | 139/737 (18.9)   | 113/677 (16.7)   | 105/727 (14.4)   | 71/693 (10.3)    | 64/707 (9.1)     |                                       |                |
| Model 1: Basic model <sup>†</sup>                                                                     | 1 (ref)          | 0.86 (0.67–1.11) | 0.73 (0.55–0.95) | 0.53 (0.39–0.73) | 0.47 (0.33–0.69) | 0.74 (0.65–0.84)                      | < 0.001        |
| Model 2: Full-adjusted<br>model <sup>‡</sup>                                                          | 1 (ref)          | 0.88 (0.68–1.14) | 0.78 (0.59–1.03) | 0.62 (0.45–0.86) | 0.66 (0.45–0.97) | 0.82 (0.72–0.94)                      | 0.004          |
| <b>Single predictor (Y7 APDQS) models</b>                                                             |                  |                  |                  |                  |                  |                                       |                |
| <b>Y7 predicting type 2<br/>diabetes over 23 years</b>                                                |                  |                  |                  |                  |                  |                                       |                |
| Range                                                                                                 | < 57             | 57 to 63         | 64 to 70         | 71 to 78         | ≥ 79             |                                       |                |
| no. of cases/ N at risk<br>(unadjusted cumulative<br>incidence rate)                                  | 146/728 (20.1)   | 113/697 (16.2)   | 100/702 (14.3)   | 81/731 (11.1)    | 52/683 (7.6)     |                                       |                |
| Model 1: Basic model <sup>§</sup>                                                                     | 1 (ref)          | 0.83 (0.65–1.06) | 0.76 (0.58–0.98) | 0.63 (0.48–0.84) | 0.47 (0.34–0.67) | 0.77 (0.69–0.86)                      | < 0.001        |
| Model 2: Full-adjusted<br>model <sup>  </sup>                                                         | 1 (ref)          | 0.90 (0.70–1.15) | 0.86 (0.66–1.11) | 0.73 (0.55–0.98) | 0.65 (0.46–0.93) | 0.85 (0.75–0.95)                      | 0.005          |

Abbreviations: CI, confidence interval; HR, hazard ratio.

\*A 1–point increment represents a 1–category shift in the presumed favorable direction.

†Model 1: Y0 APDQS and 7–year change in APDQS were fitted simultaneously in the model. Covariates included age (Y0), sex, race (white, black), and total energy intake (Y0 and 7–year change).

‡Model 2: Model 1 + parental history of diabetes (yes or no), physical activity level (Y0 and 7–year change; tertiles), smoking status (Y0; never, former, and current), highest grade of education achieved during follow-up, and BMI (Y0 and 7–year change).

§Model 1: Age (Y7), sex, race (white, black), and total energy intake (Y7).

||Model 2: Model 1 + parental history of diabetes (yes or no), physical activity level (Y7; tertiles), smoking status (Y7; never, former, and current), highest grade of education achieved during follow-up, and BMI (Y7).

\*P for interaction=0.43 was tested with the multiplicative term of 7–year change in APDQS (continuous) and Y0 APDQS (continuous) in Model 2

**Supplemental Table S6. Subsequent 23-year HR (95% CI) of incident type 2 diabetes according to joint classification of Y0 APDQS and 7-year change in APDQS (n=3,541)**

|                                                                   | 7-year change in APDQS |                  |                  |                  |                  |
|-------------------------------------------------------------------|------------------------|------------------|------------------|------------------|------------------|
|                                                                   | Quintile 1             | Quintile 2       | Quintile 3       | Quintile 4       | Quintile 5       |
| <b>Below the median of Y0 APDQS (n=1,733)</b>                     |                        |                  |                  |                  |                  |
| Range                                                             | < -5                   | -5 to 0          | 1 to 5           | 6 to 12          | ≥ 13             |
| no. of cases/ N at risk<br>(unadjusted cumulative incident rate)  | 36/149 (24.2)          | 52/278 (18.7)    | 59/361 (16.3)    | 78/439 (17.8)    | 78/506 (15.4)    |
| Unadjusted                                                        | 1.30 (0.85–1.99)       | 1 (ref)          | 0.85 (0.59–1.24) | 0.95 (0.67–1.35) | 0.80 (0.56–1.13) |
| Model 1: Basic model*                                             | 1.31 (0.85–2.00)       | 1 (ref)          | 0.87 (0.60–1.26) | 0.99 (0.69–1.40) | 0.91 (0.64–1.29) |
| Model 2: Full-adjusted model <sup>†</sup>                         | 1.14 (0.74–1.75)       | 1 (ref)          | 0.86 (0.59–1.25) | 0.91 (0.64–1.30) | 0.94 (0.66–1.34) |
| <b>At or above the median of Y0 APDQS (n=1,808)</b>               |                        |                  |                  |                  |                  |
| Range                                                             | < -5                   | -5 to 0          | 1 to 5           | 6 to 12          | ≥ 13             |
| no. of cases/ N at risk<br>(unadjusted cumulative incidence rate) | 78/546 (14.3)          | 36/405 (8.9)     | 27/347 (7.8)     | 34/344 (9.9)     | 14/166 (8.4)     |
| Unadjusted                                                        | 0.70 (0.49–1.00)       | 0.44 (0.29–0.67) | 0.38 (0.24–0.61) | 0.49 (0.32–0.75) | 0.41 (0.23–0.73) |
| Model 1: Basic model*                                             | 0.91 (0.63–1.31)       | 0.57 (0.37–0.88) | 0.51 (0.32–0.82) | 0.66 (0.42–1.03) | 0.57 (0.31–1.04) |
| Model 2: Full-adjusted model <sup>†</sup>                         | 0.99 (0.69–1.43)       | 0.63 (0.40–0.98) | 0.59 (0.36–0.95) | 0.79 (0.50–1.24) | 0.71 (0.39–1.30) |

Median cutpoint of Y0 APDQS was 63.

\*Model 1: Age (Y0), sex, race (white, black), and total energy intake (Y0 and 7-year change).

<sup>†</sup>Model 2: Model 1 + parental history of diabetes (yes or no), physical activity level (Y0 and 7-year change; tertiles), smoking status (Y0; never, former, and current), highest grade of education achieved during follow-up, and BMI (Y0 and 7-year change).

**Supplemental Table S7. The adjusted mean change\* in BMI and WC according to 7-year change in the APDQS**

| Each 1-SD<br>(13-point) increment      | Concurrent 7-year change (Y0-Y7) |      |         | Subsequent 10-year change (Y7-Y30) |      |         |
|----------------------------------------|----------------------------------|------|---------|------------------------------------|------|---------|
|                                        | <i>b</i>                         | SE   | P-value | <i>b</i>                           | SE   | P-value |
| <b>BMI, kg/m<sup>2</sup> (n=2,656)</b> |                                  |      |         |                                    |      |         |
| 7-year change (Y0-7) <sup>†</sup>      | -0.26                            | 0.08 | < 0.001 | -0.22                              | 0.13 | 0.08    |
| Y0 <sup>†</sup>                        | -0.36                            | 0.08 | < 0.001 | -0.53                              | 0.13 | < 0.001 |
| Y7 <sup>‡</sup>                        | —                                | —    | —       | -0.36                              | 0.11 | 0.001   |
| <b>WC, cm (n=2,643)</b>                |                                  |      |         |                                    |      |         |
| 7-year change (Y0-7) <sup>†</sup>      | -0.80                            | 0.20 | < 0.001 | -0.09                              | 0.31 | 0.78    |
| Y0 <sup>†</sup>                        | -1.14                            | 0.20 | < 0.001 | -0.92                              | 0.30 | 0.002   |
| Y7 <sup>‡</sup>                        | —                                | —    | —       | -0.47                              | 0.27 | 0.08    |
| <b>Weight, kg (n=2,657)</b>            |                                  |      |         |                                    |      |         |
| 7-year change (Y0-7) <sup>†</sup>      | -0.71                            | 0.22 | 0.001   | -0.53                              | 0.36 | 0.14    |
| Y0 <sup>†</sup>                        | -0.91                            | 0.22 | < 0.001 | -1.34                              | 0.36 | < 0.001 |
| Y7 <sup>‡</sup>                        | —                                | —    | —       | -0.92                              | 0.32 | 0.004   |

Abbreviations: CI, confidence interval; HR, hazard ratio; APDQS, A Priori Diet Quality Score; BMI, body mass index; WC, waist circumference.

\*Multivariable linear models are reported. Model was adjusted for current age, sex, race (white and black), and total energy intake (Y0 and 7-year change), smoking status (Y0; never, former, and current), physical activity level (Y0 and 7-year change; tertiles), and highest grade of education achieved during follow-up.

<sup>†</sup>Joint predictor models. The four models (with dependent variables concurrent BMI, concurrent WC, subsequent BMI, and subsequent WC) each included Y0 APDQS and 7-year change in APDQS. Depending on outcome variables, the following variables were also included in the model: Y0 BMI for concurrent 7-year change in BMI; Y7 BMI for subsequent 23-year change in BMI; Y0 WC for concurrent 7-year change in WC; Y7 WC for subsequent 23-year change in WC.

<sup>‡</sup>Single predictor models.

**Supplemental Figure S1. Restricted cubic splines for mutually adjusted Y0 APDQS and 20-year change in APDQS predicting subsequent 10-year type 2 diabetes risk.**

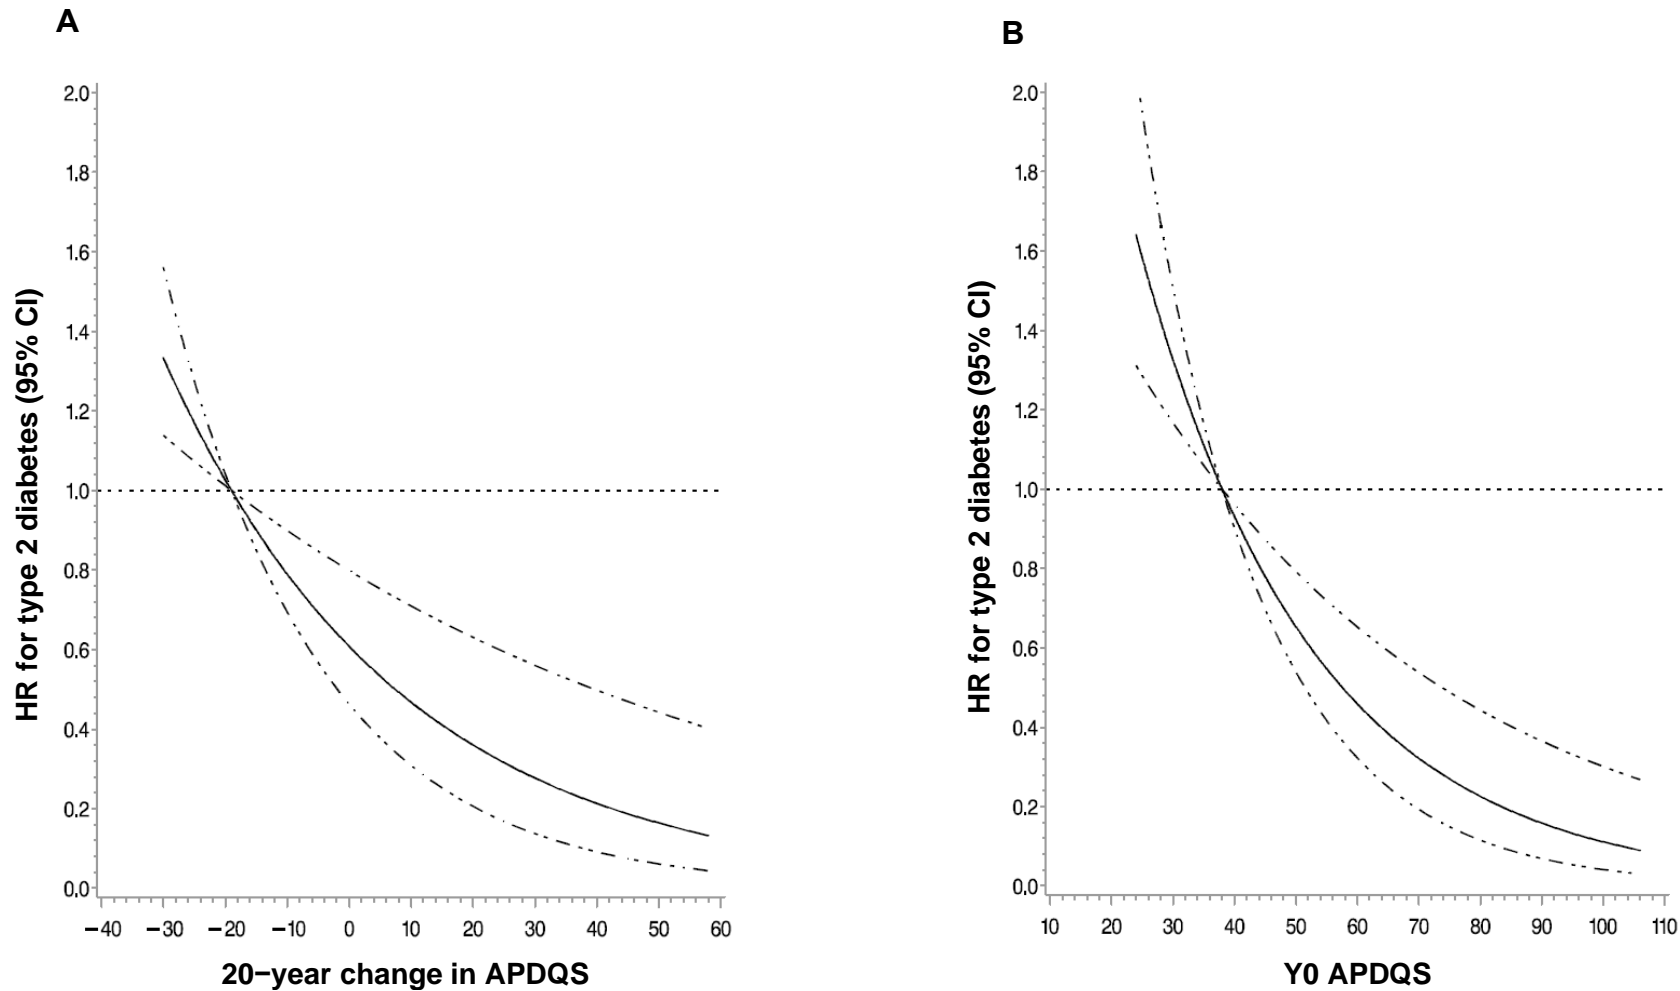

Multivariable-adjusted HRs (95% CIs) were calculated using restricted cubic spline regression with 4 knots at APDQS cutpoints of 5th, 35th, 65th, and 95th percentiles. Y0 APDQS and 20-year change in APDQS were mutually adjusted. Other covariates included age (Y0), sex, race (white, black), total energy intake (Y0 and 20-year change), parental history of diabetes (yes or no), physical activity level (Y0 and 20-year change; tertiles), smoking status (Y0; never, former, and current), and highest grade of education achieved during follow-up. Solid lines represent HRs; dashed lines represent 95% CIs; HR of 1.0 is the reference. (A) P for nonlinearity=0.74, P for linearity<0.001 (B) P for nonlinearity=0.97, P for linearity<0.001. Nonlinearity was tested using likelihood ratio tests by comparing

two models, (a) model with the linear term and (b) the model with the linear and cubic spline terms in the Model 2. The tests for linearity were performed by comparing the linear model with the model including only the covariates using a likelihood ratio test. Abbreviations: CI, confidence interval; HR, hazard ratio, APDQS, A Priori Diet Quality Score.
